# Supplementary material for: Polymeric Nanoparticles for Increasing Oral Bioavailability of Curcumin
Source: PubMed Central journal article supplement (PMC5946112; doi:10.3390/antiox7040046), 2018-03-24
Supplement: antioxidants-07-00046-s001.pdf [file antioxidants-07-00046-s001.pdf]

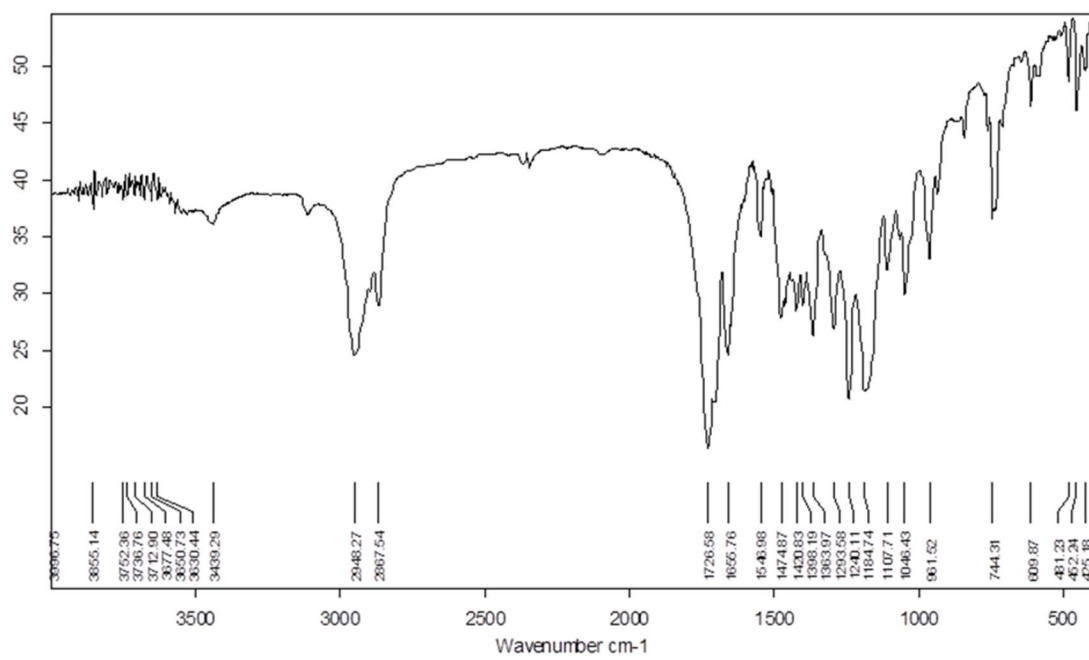

(a)

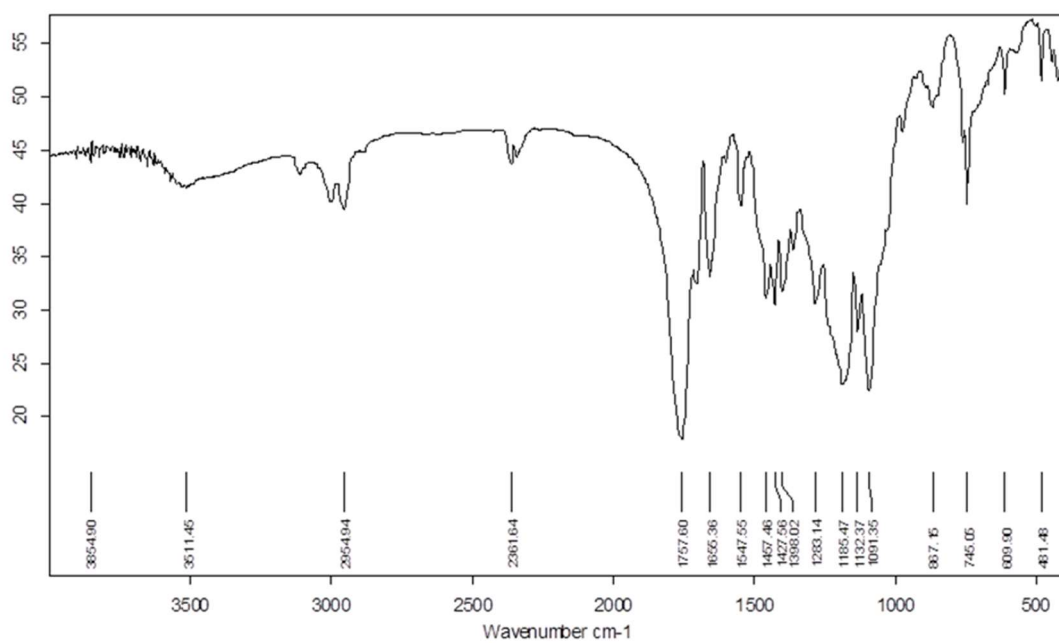

(b)

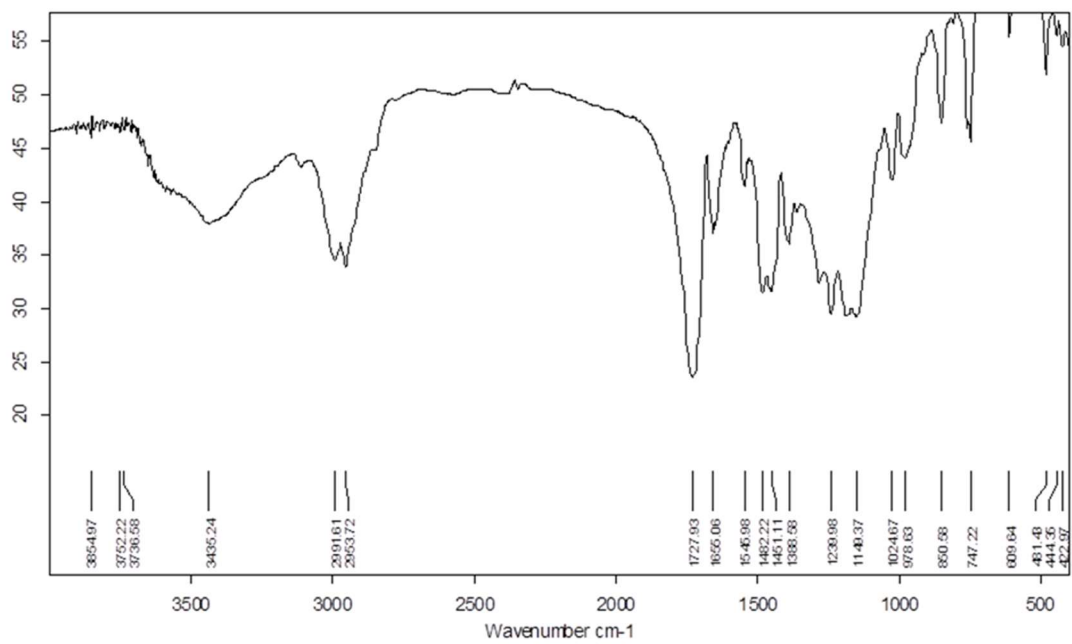

(c)

**Figure S1.** FTIR spectra of (a) PCL (b) PLGA and (c) ERL. Polymers were analyzed using a Bruker Vector 22 FTIR spectrophotometer. KBr discs with a 1% w/w sample loading were prepared by compression.
